# Supplementary material for: Persulfate-enhanced degradation of propranolol over BiOCl0.5I0.5 under visible light irradiation
Source: Royal Society of Chemistry journal article supplement (doi:10.1039/d3nj05349k), 2024-01-01

**Fig. S1** FT-IR spectra of  $\text{BiOCl}_{0.5}\text{I}_{0.5}$ ,  $\text{BiOCl}$  and  $\text{BiOI}$

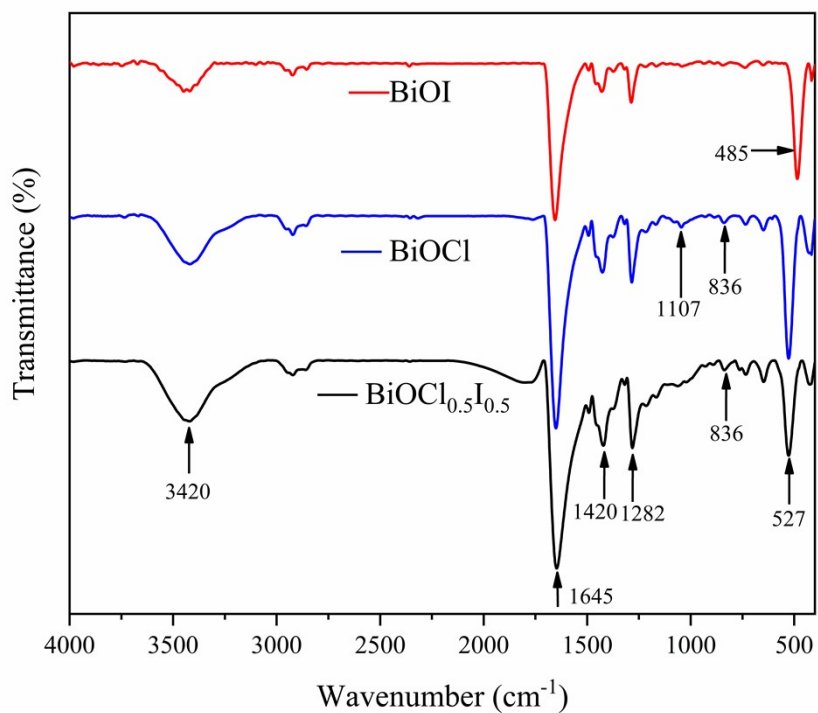

**Fig. S2** PL spectra of  $\text{BiOCl}_{0.5}\text{I}_{0.5}$ ,  $\text{BiOCl}$  and  $\text{BiOI}$

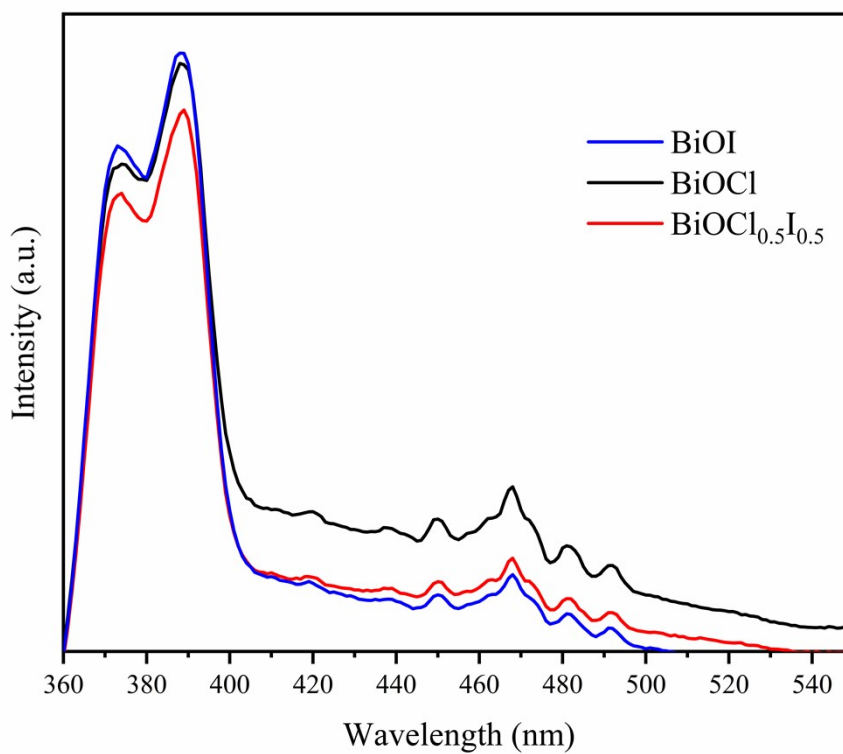

**Fig. S3** Variation of reaction rate constant  $k$  under different reaction systems

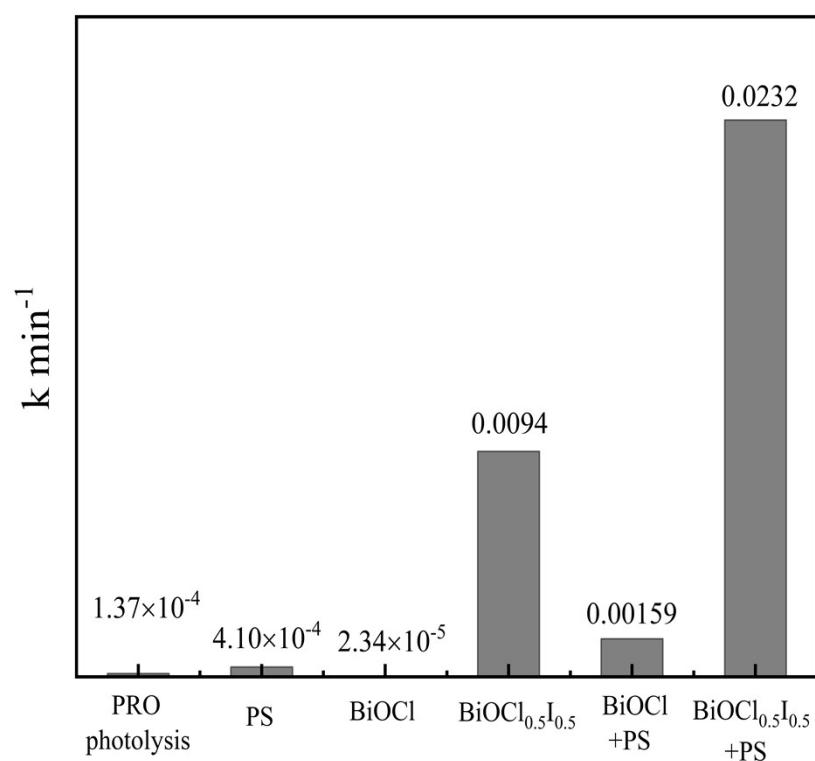

**Fig. S4** PRO degradation kinetics on BiOCl, BiOCl<sub>0.9</sub>I<sub>0.1</sub>, BiOCl<sub>0.7</sub>I<sub>0.3</sub>, BiOCl<sub>0.5</sub>I<sub>0.5</sub>, BiOCl<sub>0.3</sub>I<sub>0.7</sub>, BiOCl<sub>0.1</sub>I<sub>0.9</sub> and BiOI [PS = 0.4 mM, catalysts = 0.01 g, PRO = 10 mg/L]

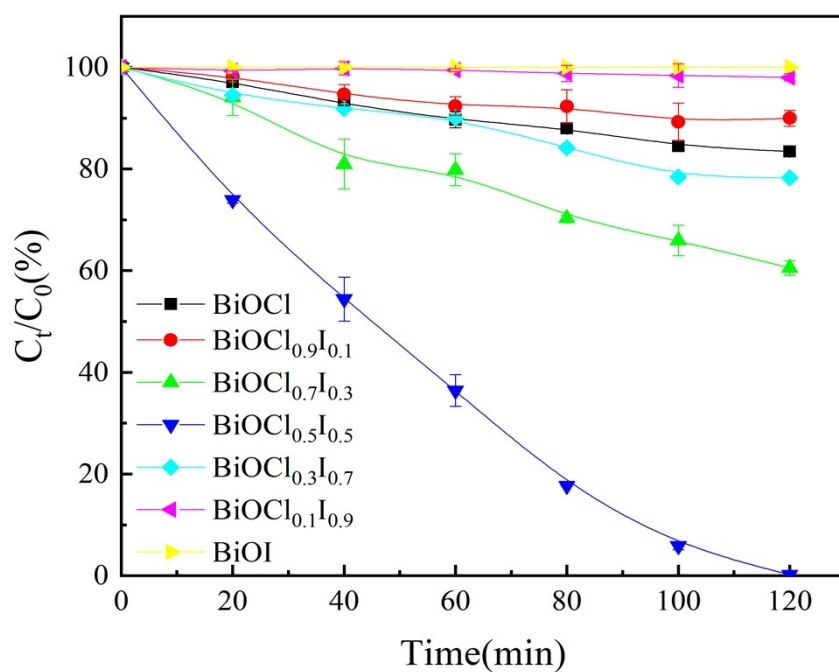

**Fig. S5** Variation of reaction rate constant  $k$  under different pH conditions

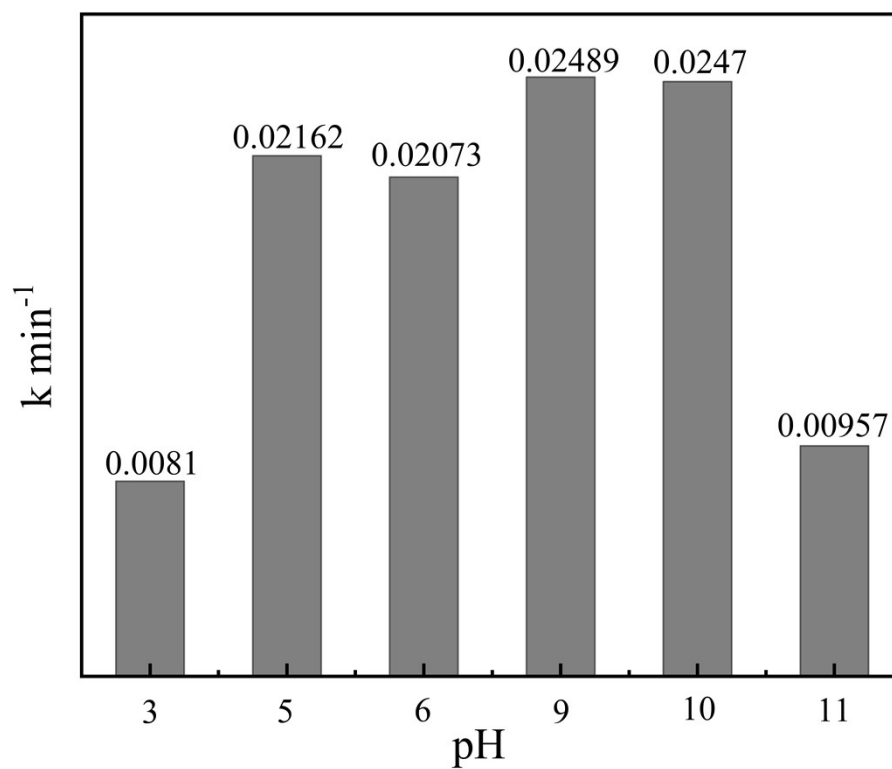

**Fig. S6** pH of the solution after the photodegradation

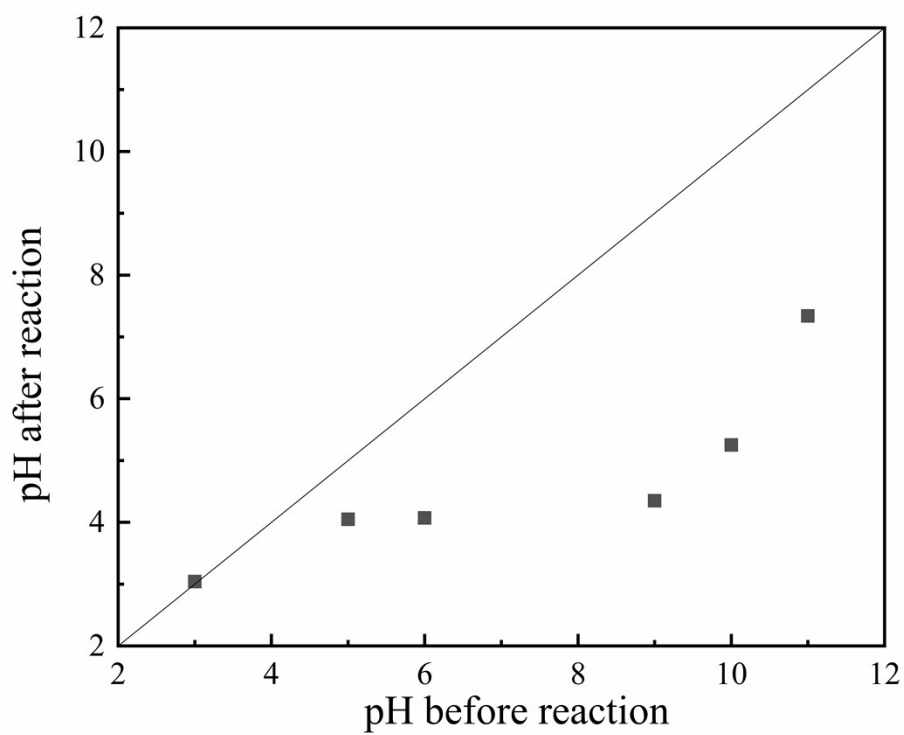

**Fig. S7** Effect of initial PRO concentration on PRO degradation [PS = 0.4 mM,

BiOCl<sub>0.5</sub>I<sub>0.5</sub> = 0.01 g, PRO = 10 mg/L]

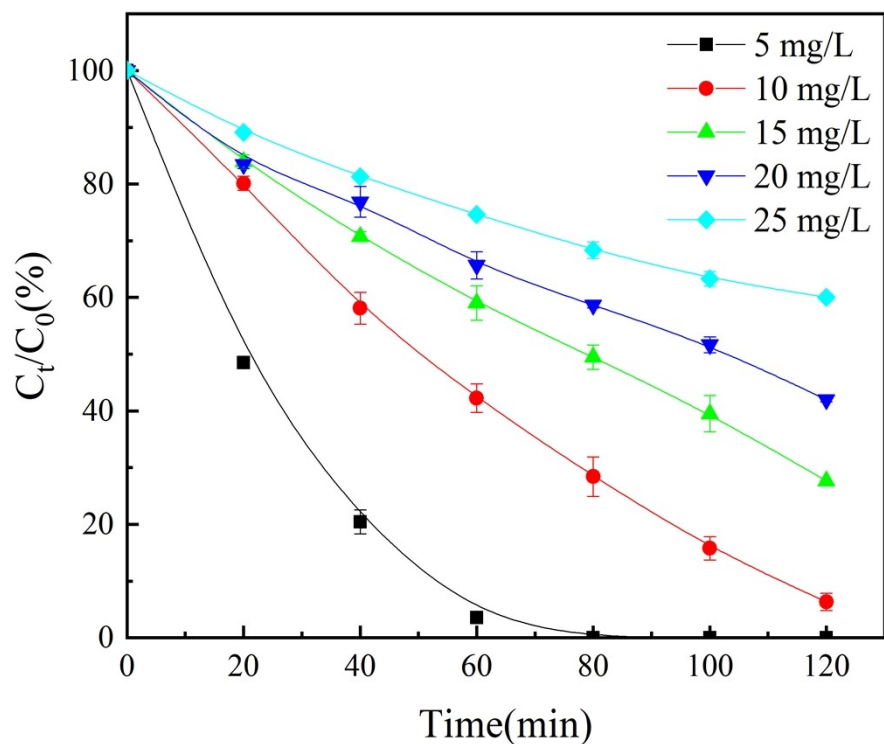

**Fig. S8** Variation of reaction rate constant k under different HA concentrations

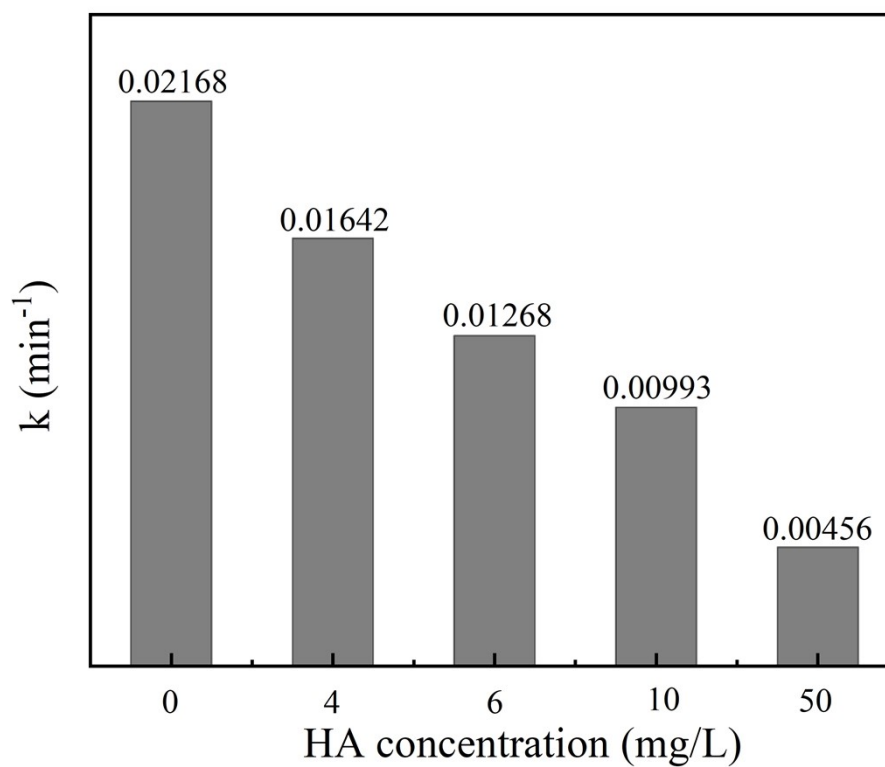

**Fig. S9** (a) Cycling experiments of the  $\text{BiOCl}_{0.5}\text{I}_{0.5}/\text{PS}$  system [PS = 0.4 mM,  $\text{BiOCl}_{0.5}\text{I}_{0.5}$  = 0.01 g, PRO = 10 mg/L] (b) XRD patterns of the fresh and reuse  $\text{BiOCl}_{0.5}\text{I}_{0.5}$

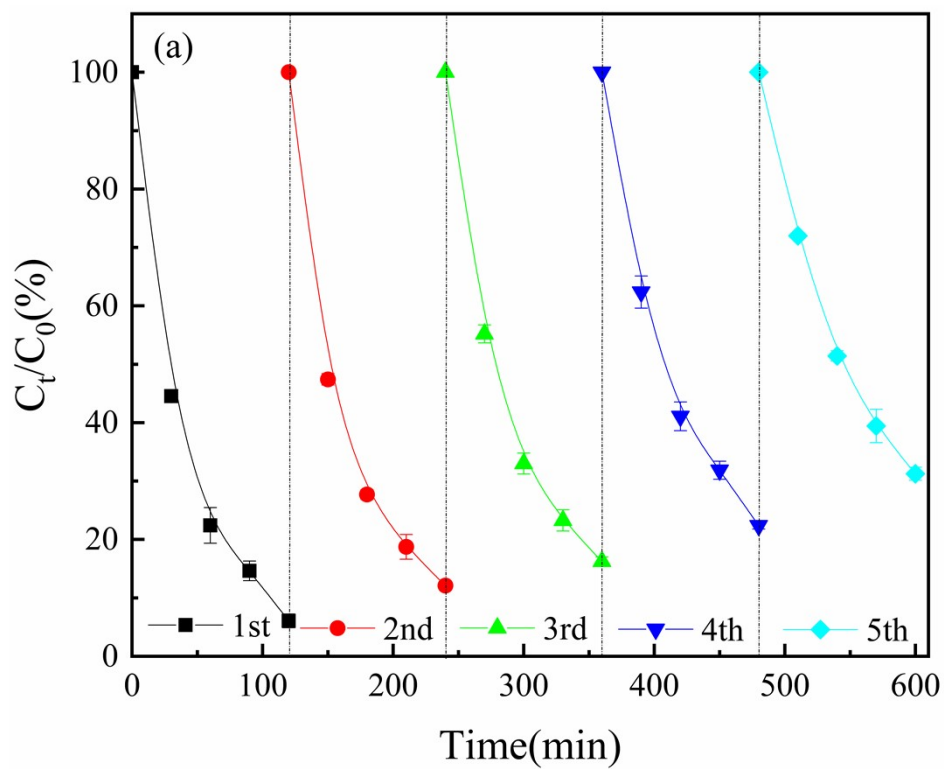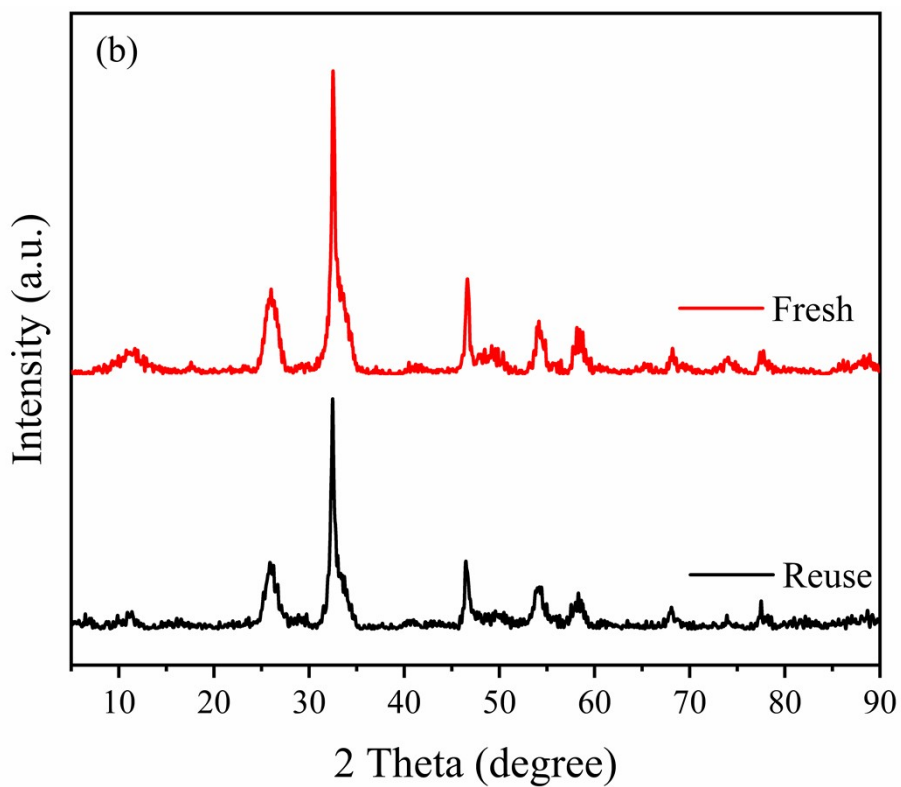

Fig. S10 EPR spectrum results under different conditions

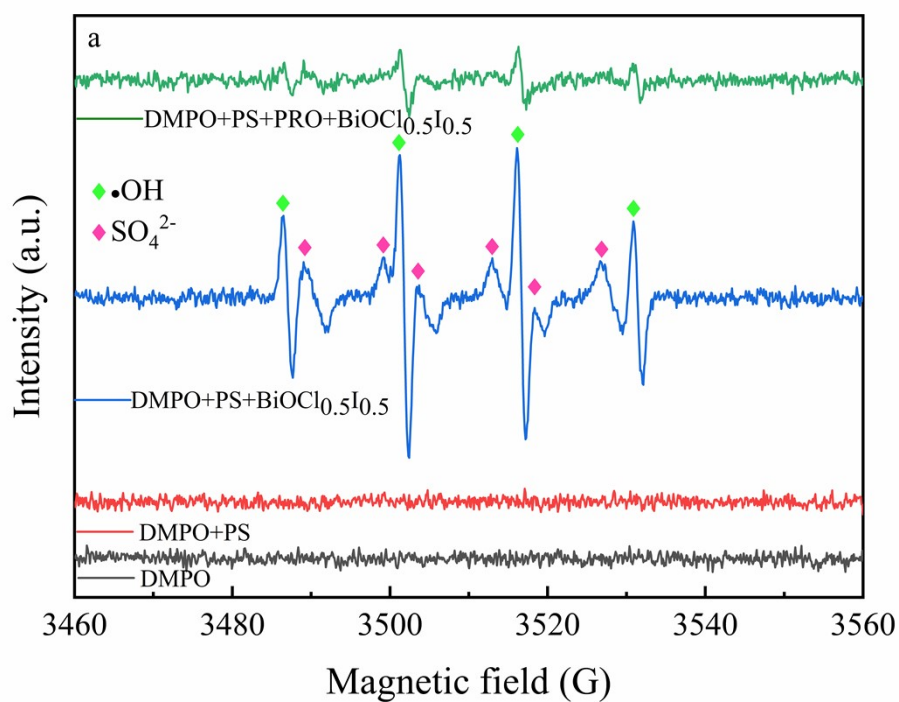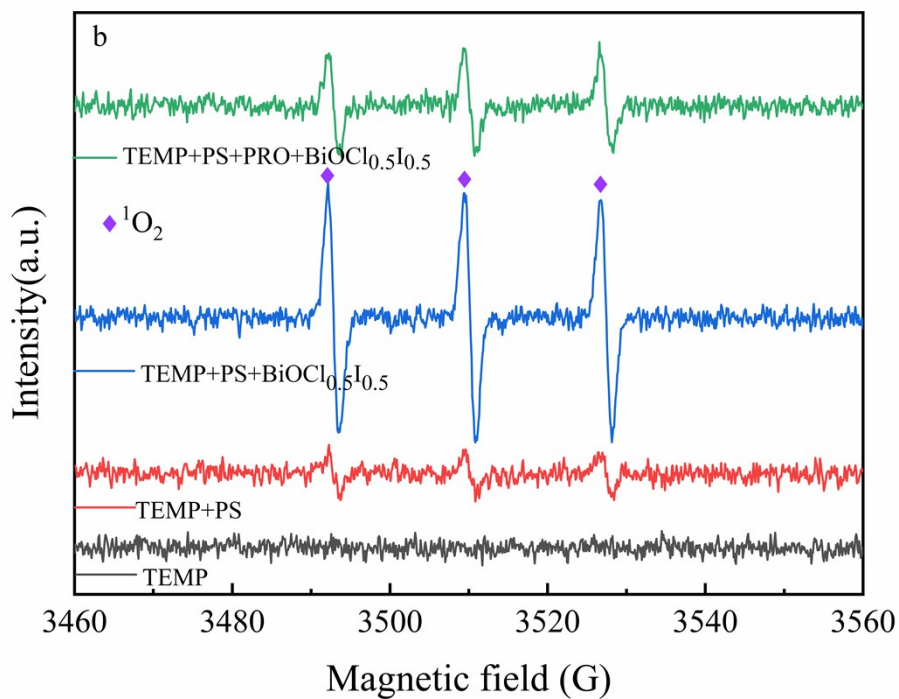

Fig. S11 VB-XPS of  $\text{BiOCl}_{0.5}\text{I}_{0.5}$

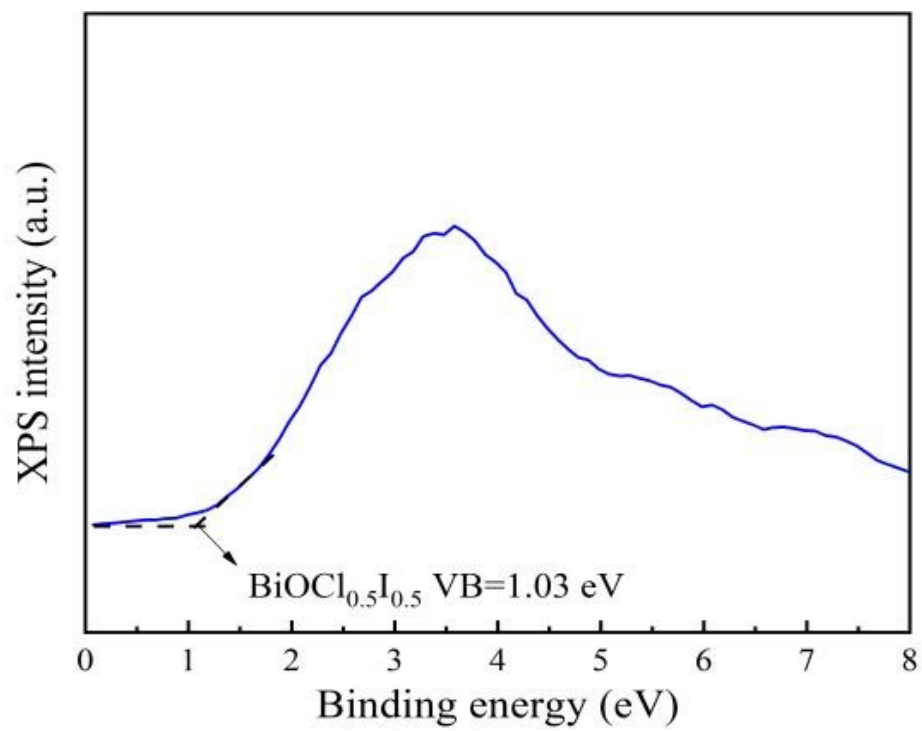

Supplement: d3nj05349k1.pdf [file d3nj05349k1.pdf]
